# Supplementary material for: Expression of Transcription Factor ZBTB20 in the Adult Primate Neurogenic Niche under Physiological Conditions or after Ischemia
Source: MDPI journal article supplement (doi:10.3390/genes13091559), 2022-08-29
Supplement: s1 [file s1]

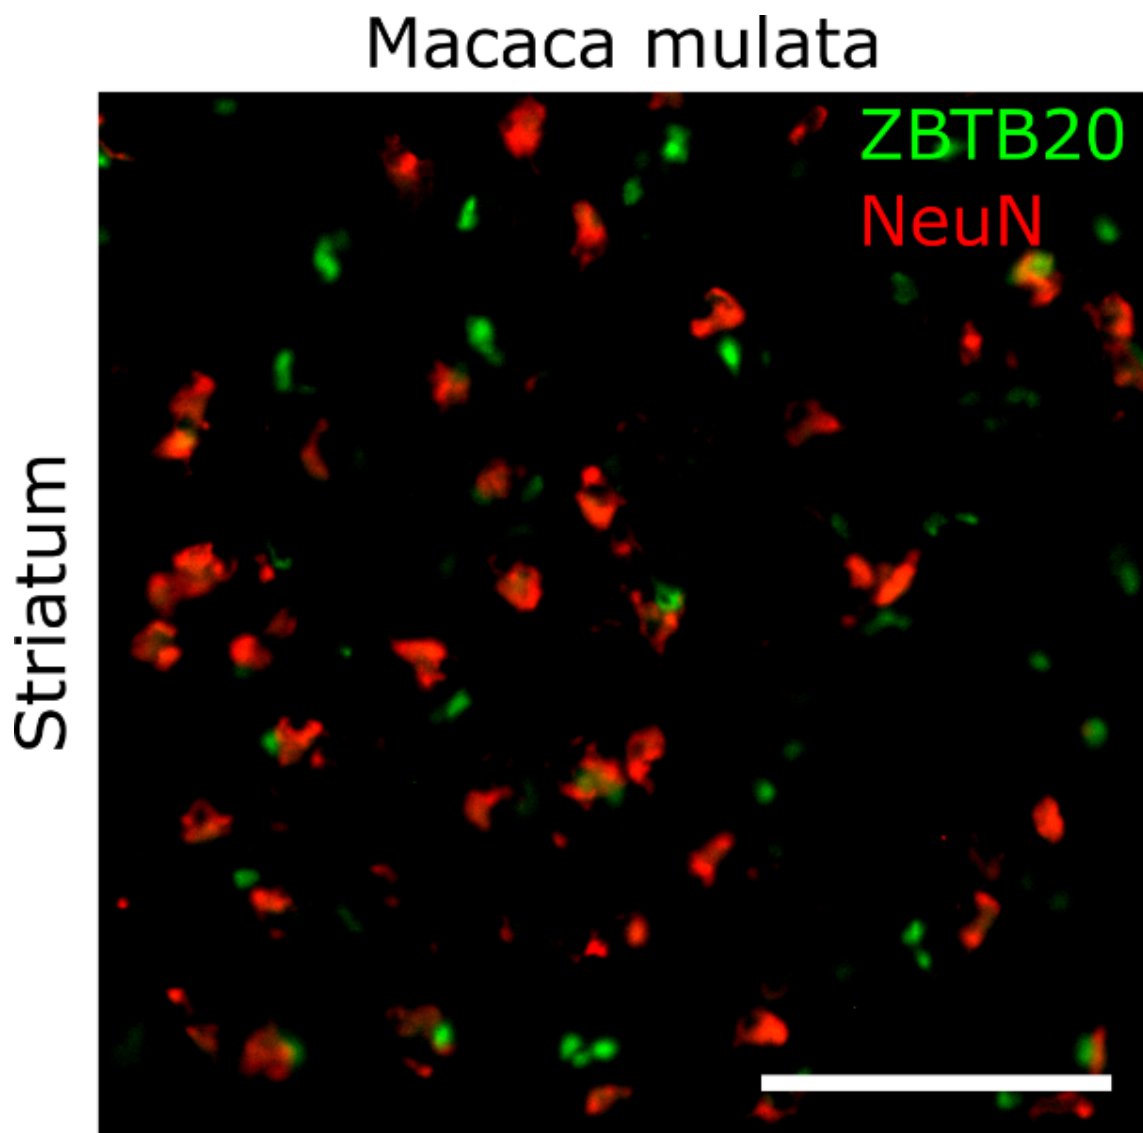

**Figure S1. ZBTB20 is absent in mature striatal neurons** Double-staining for ZBTB20 and NeuN in macaque striatum shows absence of double-positive cells. Scale bar: 100µm.

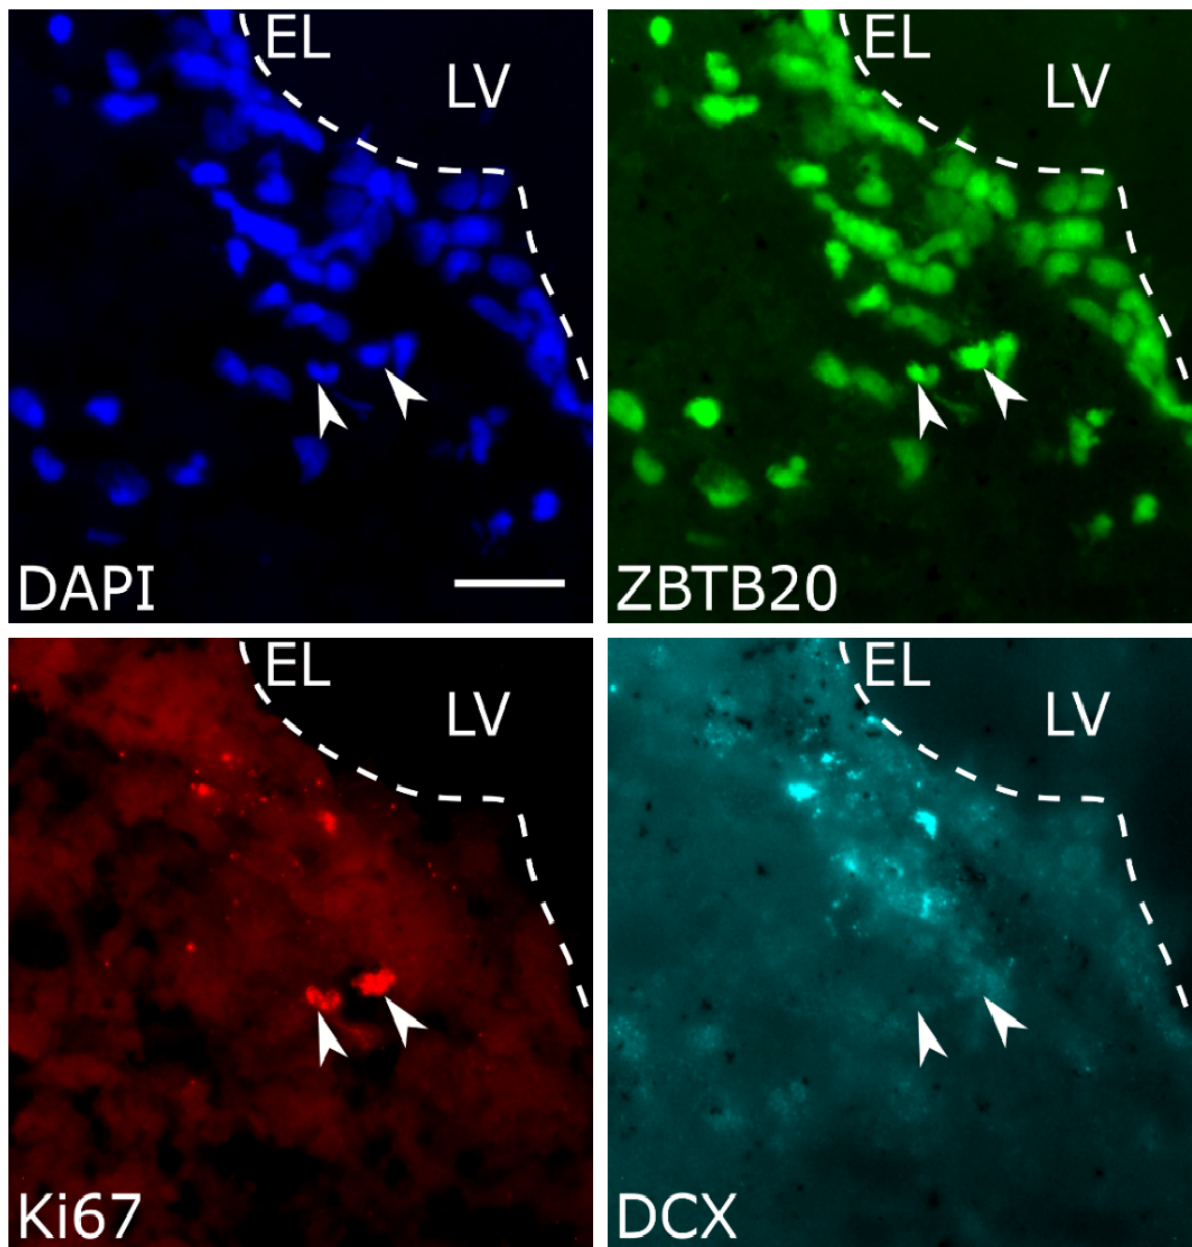

**Figure S2. Combinatorial labeling of ZBTB20 with Ki67 and DCX.** Triple-staining for Ki67, ZBTB20 and DCX in macaque monkey SEL shows presence of Ki67<sup>+</sup>/ZBTB20<sup>+</sup> cells which are negative for DCX (arrowheads). EL – ependymal layer, LV – lateral ventricle. Scale bar: 20µm.
